# Supplementary material for: Regulation of ROS metabolism in macrophage via xanthine oxidase is associated with disease progression in pulmonary tuberculosis
Source: Research Square preprint supplement (doi:10.21203/rs.3.rs-4910396/v1), 2024-10-11
Supplement: Supplementary file 1 [file 7e2e81ca1376504efd5b3f06.docx]

**Table S1．Primer Information**

| **Gene Name** | **Primers** | **Primer sequences** |
| --- | --- | --- |
| XO | Forward | CTGCGATTTGAAGGGGAGC |
| Reverse | TCAATGCCAATCTCCGTGTTC |
| TNF | Forward | CCTCTCTCTAATCAGCCCTCTG |
| Reverse | GAGGACCTGGGAGTAGATGAG |
| IL1B | Forward | ATGATGGCTTATTACAGTGGCAA |
| Reverse | GTCGGAGATTCGTAGCTGGA |
| IL6 | Forward | ACTCACCTCTTCAGAACGAATTG |
| Reverse | CCATCTTTGGAAGGTTCAGGTTG |
| GAPDH | Forward | GGAGCGAGATCCCTCCAAAAT |
| Reverse | GGCTGTTGTCATACTTCTCATGG |

Forward, forward primer for the gene (5′ to 3′ on the plus strand); Reverse, reverse primer for the gene (5′ to 3′ on the minus strand).
